# Supplementary material
Source: PubMed Central journal article supplement (PMC5214959)
Supplement: NIHMS837366-supplement-Supporting_information.pdf [file NIHMS837366-supplement-Supporting_information.pdf]

# **Repetitive Dosing of Fumed Silica Leads to Pro-Fibrogenic Effects Through Unique Structure-Activity Relationships and Biopersistence in the Lung**

Bingbing Sun,<sup>1</sup> Xiang Wang,<sup>2</sup> Yu-Pei Liao,<sup>1</sup> Zhaoxia Ji,<sup>2</sup> Chong Hyun Chang,<sup>2</sup> Suman Pokhrel,<sup>3</sup> Justine Ku,<sup>4</sup> Xiangsheng Liu,<sup>1</sup> Meiyong Wang,<sup>1</sup> Darren R. Dunphy,<sup>5</sup> Ruibin Li,<sup>1</sup> Huan Meng,<sup>1</sup> Lutz Mädler,<sup>3</sup> C. Jeffrey Brinker,<sup>5,6,7</sup> André E. Nel,<sup>1,2,\*</sup> and Tian Xia<sup>1,2,\*</sup>

<sup>1</sup>Division of NanoMedicine, Department of Medicine, University of California, Los Angeles, CA 90095, United States; <sup>2</sup>California NanoSystems Institute, University of California, Los Angeles, CA 90095, United States; <sup>3</sup>Foundation Institute of Materials Science (IWT), Department of Production Engineering, University of Bremen, Germany; <sup>4</sup>Department of Ecology and Evolutionary Biology, University of California, Los Angeles, CA 90095, United States; <sup>5</sup>Department of Chemical and Nuclear Engineering, University of New Mexico, Albuquerque, New Mexico 87131, United States; <sup>6</sup>Department of Molecular Genetics and Microbiology, University of New Mexico, Albuquerque, New Mexico 87131, United States; <sup>7</sup>Self-Assembled Materials Department, Sandia National Laboratories, PO Box 5800 MS1349, Albuquerque, New Mexico 87185, United States.

*\*Address correspondence to [txia@ucla.edu](mailto:txia@ucla.edu) or [anel@mednet.ucla.edu](mailto:anel@mednet.ucla.edu).*

---

**Table S1. Dosimetry calculations for fumed silica**

---

1. Calculated monthly amorphous silica in a silica manufacturing facility, where workers were exposed to 10.5 mg/m<sup>3</sup> precipitated amorphous silica.<sup>1</sup>

**Assumptions:**

- Ventilation rate of a healthy human adult: 20 [L/min]
- Deposition fraction: 30%
- Monthly exposure period: 8 [h/day], 5 [d/week], 4 weeks

**Calculation of monthly deposition:**

$$\frac{10.5\text{mg}}{\text{m}^3} \times \frac{20\text{L}}{\text{min}\cdot\text{person}} \times 30\% \times \frac{60\text{min}}{\text{hour}} \times \frac{8\text{hour}}{\text{day}} \times \frac{5\text{day}}{\text{week}} \times \frac{4\text{week}}{\text{month}} \times \frac{\text{m}^3}{1000\text{L}} = 604 \text{ mg/person}$$

**2. Monthly deposition level (mass/surface area) in a human worker****Assumptions:**

- Human alveolar surface area: 102 [m<sup>2</sup>/person]

**Calculation:**

$$\frac{604\text{mg}}{\text{min}\cdot\text{person}} \times \frac{\text{person}}{102\text{m}^2} \times \frac{1000\mu\text{g}}{\text{mg}} = 5.921 \text{ mg/m}^2$$

**3. Comparable deposition level in a mouse receiving a one-time instillation****Assumptions:**

- Alveolar epithelium surface area of a mouse: 0.05 [m<sup>2</sup>/mouse];
- Weight of a mouse: 25 [g]

**Calculation:**

$$\frac{5.921\text{mg}}{\text{m}^3\cdot\text{month}} \times \frac{0.05 \text{ m}^2}{\text{mouse}} \times \frac{\text{mouse}}{25\text{g}} \times \frac{1000\text{g}}{\text{kg}} = 11.98 \text{ mg/kg}$$

The chosen dose range of 6, 9 and 21 [mg/kg] in our study covers the calculated dose of 11.98 [mg/kg] per mouse, which is calculated based on a real-life exposure measurement of amorphous silica in a manufacturing facility.<sup>1</sup>

---

**Figure S1**

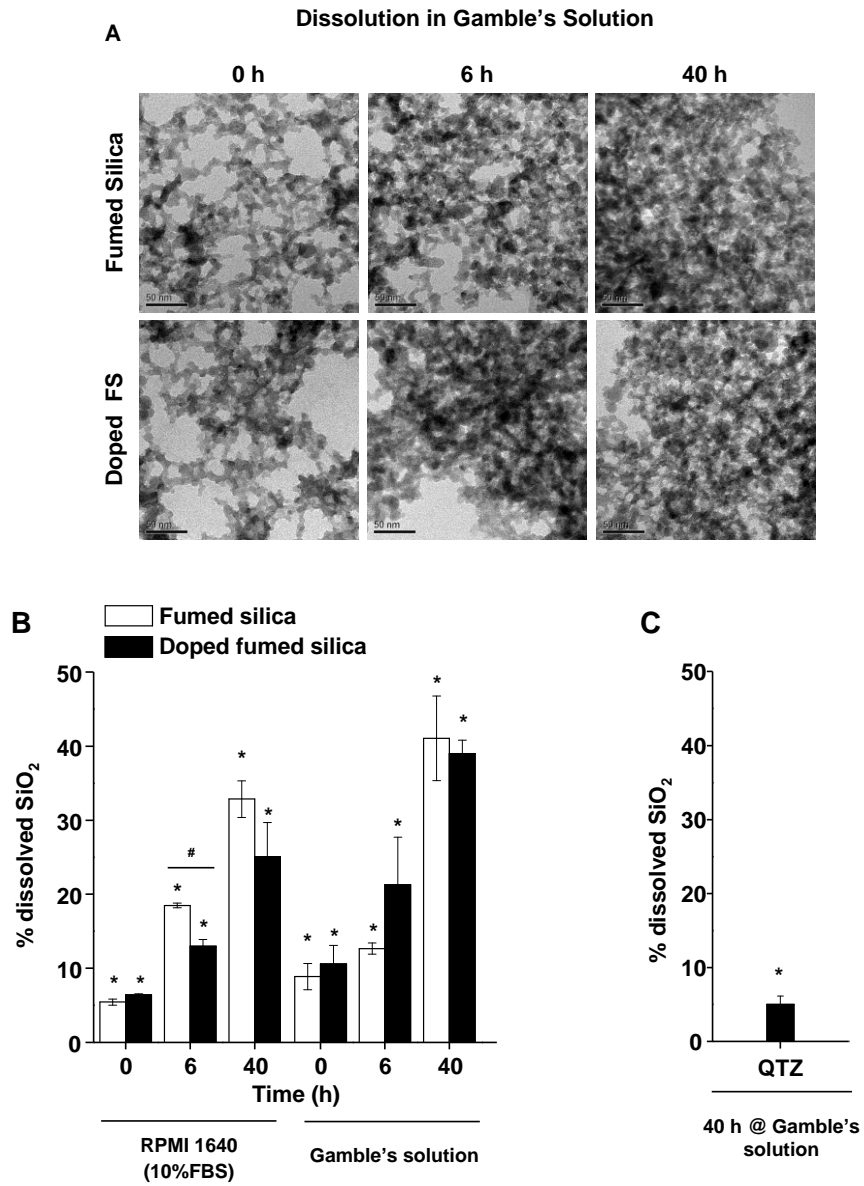

**Figure S1. Fumed silica dissolution in simulated biological fluids.** (A) TEM analysis showing silica dissolution in Gamble's Solution. 20  $\mu$ L of the fumed silica stock solution (5 mg/mL) was added to 980  $\mu$ L of exposure media before sonication. The particle suspension was incubated at 37  $^{\circ}$ C. Samples were taken at 0, 6, and 40 h, centrifuged at 15,000 rpm, and each pellet was washed and re-suspended in water for TEM analysis.

The scale bar is 50 nm. (B) ICP-OES analysis to study the time-dependent Si release from pristine and 7% Ti-doped fumed silica in various exposure media. 20  $\mu$ L of each fumed silica stock solution (5 mg/mL) was added to 980  $\mu$ L of exposure medium before sonication. The particle suspension was incubated at 37 °C. Samples were taken at 0, 6, and 40 h, centrifuged at 15,000 rpm, and each supernatant was collected for acid digestion and ICP-OES analysis. \* $p$ <0.05 compared to control exposure media without particles. # $p$ <0.05 compared to pristine fumed silica. (C) Dissolution of MIN-U-SIL, a natural form of  $\alpha$ -quartz (QTZ), was assessed in Gamble solution for 40 hr at 37 °C. \* $p$ <0.05 compared to control exposure media without particles.

**Figure S2**

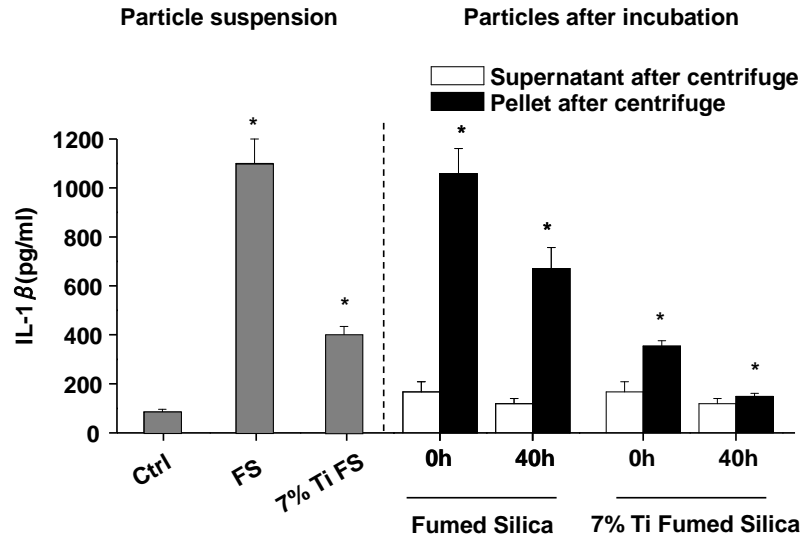

**Figure S2. The induction of IL-1 $\beta$  production by fumed silica was reduced by Ti-doping.** Fumed silica was added to Gamble's Solution at 100  $\mu\text{g/ml}$  and the particle suspension was incubated at 37  $^{\circ}\text{C}$ . Samples were taken at 0 and 40 h, and centrifuged at 15,000 rpm. Supernatant and pellet were collected separately, and then exposed to THP-1 cells. \*  $p < 0.05$  compared to control cells without particle treatment.

Figure S3

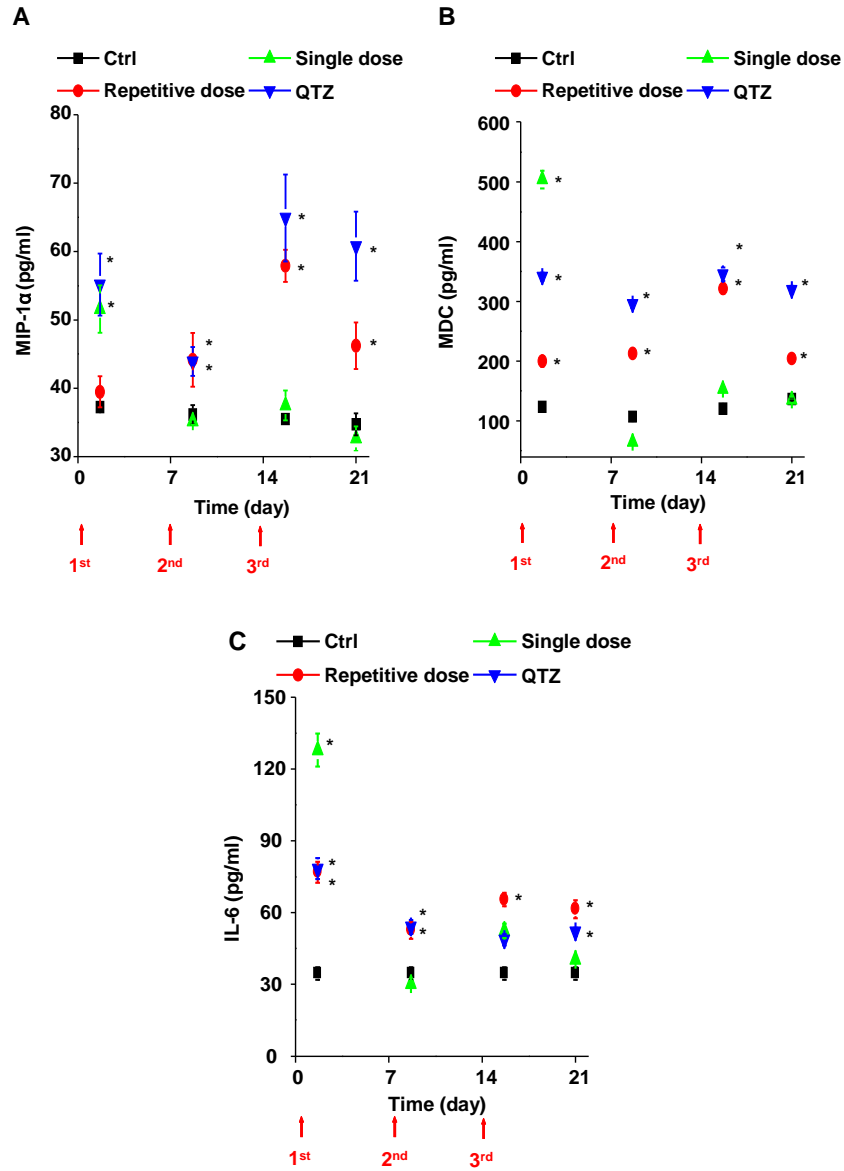

**Figure S3. Comparative analysis of the cytokine kinetics of single vs. repetitive dose fumed silica exposures.** C57BL/6 (n=6) mice were exposed to either a single dose of 21 mg/kg or 3 doses of 7 mg/kg fumed silica, one week apart, by oropharyngeal aspiration. On day 21, BAL fluid was collected to determine (A) MIP-1 $\alpha$ , (B) MDC, and (C) IL-6 levels. \*  $p < 0.05$  compared to control mice without particle treatment.

Figure S4

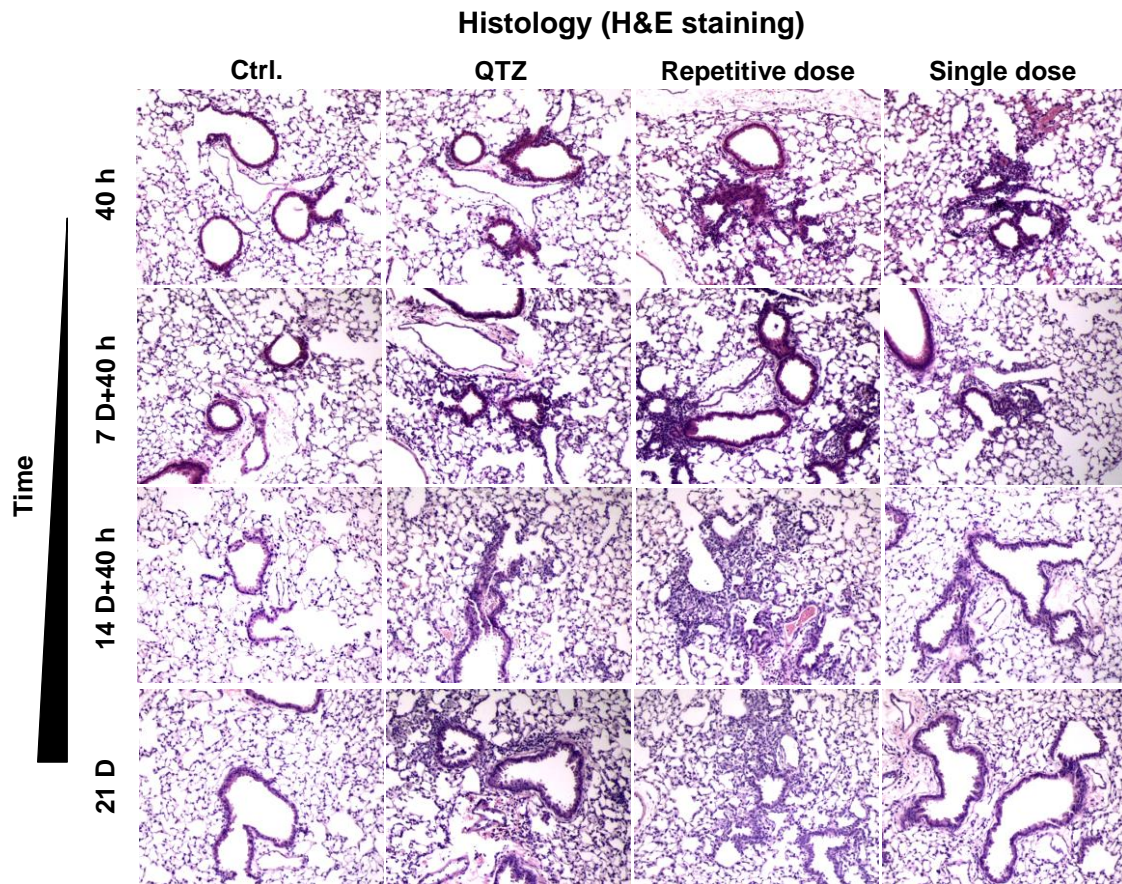

**Figure S4. Comparative analysis of lung inflammation kinetics induced by single vs. repetitive fumed silica exposures.** C57BL/6 (n=6) mice were exposed to either single dose of 21 mg/kg or 3 doses of 7 mg/kg fumed silica, one week apart, by oropharyngeal aspiration. On day 21, mice were sacrificed. H&E staining images showed the presence of focal inflammation in the lungs of animals treated with fumed silica.

**Figure S5**

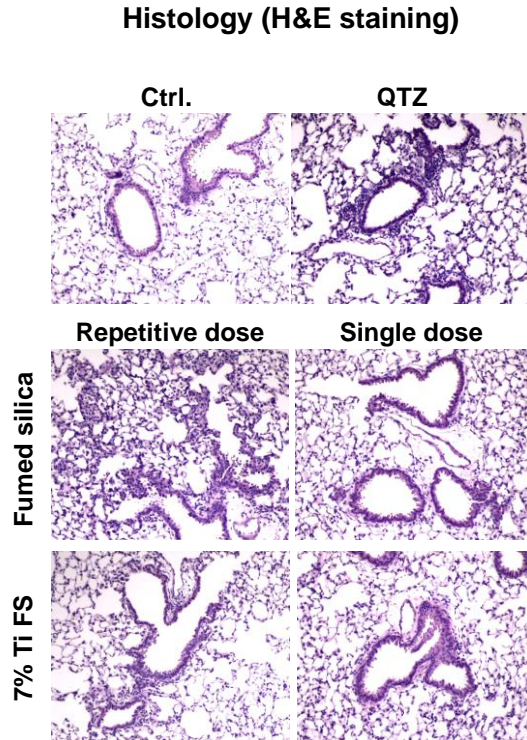

**Figure S5. Ti doping ameliorated the pro-fibrogenic effects of fumed silica during repetitive dosing.** C57BL/6 (n=6) mice were exposed to either a single dose of 21 mg/kg or 3 x 7 mg/kg pristine or 7% Ti-doped fumed silica, one week apart by oropharyngeal aspiration. On day 21, mice were sacrificed. H&E staining images show the presence of focal inflammation in the lungs of animals treated with fumed silica, and Ti doping reduce the inflammatory effects.

**References:**

1. Choudat, D.; Frisch, C.; Barrat, G.; el Kholti, A.; Conso, F., Occupational Exposure to Amorphous Silica Dust and Pulmonary Function. *Br. J. Ind. Med.* **1990**, 47, 763-766.
